# Supplementary material
Source: publisher site journal article supplement (https://www.dovepress.com/get_supplementary_file.php?f=329662.docx)
Supplement: Supplementary file 1 [file get_supplementary_file.php]

Supplementary materials

| Supplementary table **S1**. Shows primer pairs used for CYP2C19 variant allele genotyping | | |
| --- | --- | --- |
| Variant allele | SNP ID | Primer pairs |
| CYP2C19 *2 | rs4244285 | Forward: 5'- ATAGCAGGGACTATCTTTGT-3', Reverse: 5'- AATACGCAAGCAGTCACATA-3' |
| CYP2C19 *3 | rs4986893 | Forward: 5'- CTTTCATCCTGGGCTGTGCT-3', Reverse: 5'-CAAACACCTCTGCCCTATTC-3' |
